# Supplementary material
Source: HighWire-hosted journal article supplement (https://bmjopen.bmj.com/content/15/3/e091482)
Supplement: inline-supplementary-material-1 [file inline-supplementary-material-1.pdf]

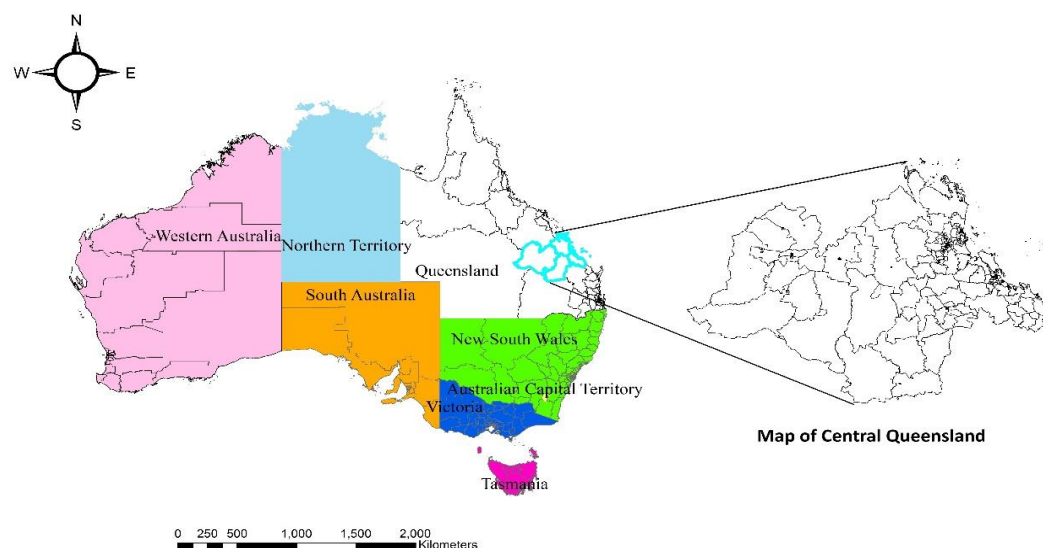

**Supplemental Figure 1.** Locator map of the study area.

**Source:** The map was developed using the digital boundary files from the Australian Bureau of Statistics.
