# Supplementary material
Source: HighWire-hosted journal article supplement (https://bmjopen.bmj.com/content/15/3/e091482)
Supplement: inline-supplementary-material-2 [file inline-supplementary-material-2.pdf]

**Supplemental Table 1.** ICD-10-AM codes related to allergic conditions.

| Condition                   | ICD-10-AM Code                                                                                                     |
|-----------------------------|--------------------------------------------------------------------------------------------------------------------|
| Allergy, unspecified        | T78.4, Z91.0                                                                                                       |
| Allergic atopic dermatitis  | L20, L20.8, L20.9                                                                                                  |
| Allergic contact dermatitis | L23, L23.0-L23.9                                                                                                   |
| Allergic conjunctivitis     | H10.1, H10.2, H10.3, H10.4,                                                                                        |
| Allergic gastroenteritis    | K52.2                                                                                                              |
| Allergic purpura            | D69.0                                                                                                              |
| Allergic rhinitis           | J30, J30.1, J30.2, J30.3, J30.4, J30.5                                                                             |
| Allergic urticaria          | L50.0, L50.8                                                                                                       |
| Anaphylaxis                 | T78.0, T78.1, T78.2, T80.5, T88.6                                                                                  |
| Asthma                      | J45.0, J45.8, J45.9, J46                                                                                           |
| Food allergy                | Y37.0-Y37.9, Y37.2, Y37.20, Y37.21, Y37.22, Y37.23, Y37.29, Y37.3,<br>Y37.30, Y37.31, Y37.32, Y37.39, Y37.4, Y37.5 |
